# Supplementary material for: Repurposed Transcriptomic Data Reveal Small Viral RNA Produced by Influenza Virus during Infection in Mice
Source: PubMed Central journal article supplement (PMC5082947; doi:10.1371/journal.pone.0165729), 2016-10-27
Supplement: pone.0165729.s003.pdf [file pone.0165729.s003.pdf]

Table S1: Read mapping of small RNA to PR8 genome

| Expt (SRA identifier) | Mouse Strain       | Strain susceptibility to influenza | Total reads | PR8-specific reads | % PR8-specific reads | PR8-specific reads |       |       | % svRNA of PR8-specific reads | % svRNA of total reads |
|-----------------------|--------------------|------------------------------------|-------------|--------------------|----------------------|--------------------|-------|-------|-------------------------------|------------------------|
|                       |                    |                                    |             |                    |                      | cRNA               | vRNA  | svRNA |                               |                        |
| SRR452392             | 129                | 0.54                               | 20005573    | 40566              | 0.20                 | 15539              | 25027 | 3040  | 7.49                          | 0.015                  |
| SRR452393             | 129                | 0.54                               | 16086702    | 11234              | 0.07                 | 4635               | 6599  | 744   | 6.62                          | 0.005                  |
| SRR452395             | CAST               | 0.38                               | 15252479    | 19540              | 0.13                 | 8679               | 10861 | 1095  | 5.60                          | 0.007                  |
| SRR452396             | CAST               | 0.38                               | 9247648     | 10668              | 0.12                 | 4156               | 6512  | 761   | 7.13                          | 0.008                  |
| SRR452398             | PWK                | 0.94                               | 24519470    | 15047              | 0.06                 | 6316               | 8731  | 1443  | 9.59                          | 0.006                  |
| SRR452399             | PWK                | 0.94                               | 20194273    | 8889               | 0.04                 | 3556               | 5333  | 926   | 10.42                         | 0.005                  |
| SRR452402             | WSB                | 0.18                               | 22905860    | 15389              | 0.07                 | 8519               | 6870  | 615   | 4.00                          | 0.003                  |
| SRR452401             | WSB*               | 0.18                               | 23873659    | 26                 | 1.09E-04             | 13                 | 13    | -     | -                             | -                      |
| <i>average**</i>      | -                  | -                                  | 18316001    | 17333              | 0.10                 | 7343               | 9990  | 1232  | 7.27                          | 0.007                  |
| SRR452394             | 129 mock-infected  | 0.54                               | 20939618    | 44                 | 2.10E-04             | 22                 | 22    | -     | -                             | -                      |
| SRR452397             | CAST mock-infected | 0.38                               | 9135927     | 5                  | 5.47E-05             | 3                  | 2     | -     | -                             | -                      |
| SRR452400             | PWK mock-infected  | 0.94                               | 17364761    | 1                  | 5.76E-06             | 0                  | 1     | -     | -                             | -                      |
| SRR452403             | WSB mock-infected  | 0.18                               | 19712916    | 2                  | 1.01E-05             | 0                  | 2     | -     | -                             | -                      |

\* indicates a replicate injected with PR8 that does not appear to have been successfully infected

\*\*average for infected examples excludes abnormal sample SRR452401
