# Supplementary material for: Repurposed Transcriptomic Data Reveal Small Viral RNA Produced by Influenza Virus during Infection in Mice
Source: PubMed Central journal article supplement (PMC5082947; doi:10.1371/journal.pone.0165729), 2016-10-27
Supplement: pone.0165729.s004.pdf [file pone.0165729.s004.pdf]

Table S2: Segment distribution of PR8-specific reads

|              | SRR452392    | SRR452393    | SRR452395    | SRR452396    | SRR452398    | SRR452399   | SRR452402    | <b>Total</b>  | % of all PR8-specific reads |
|--------------|--------------|--------------|--------------|--------------|--------------|-------------|--------------|---------------|-----------------------------|
| Segment 1    | 3468         | 1023         | 1515         | 1055         | 1143         | 630         | 1322         | <b>10156</b>  | 8.37                        |
| Segment 2    | 8798         | 2426         | 4652         | 2479         | 3007         | 2009        | 3048         | <b>26419</b>  | 21.77                       |
| Segment 3    | 7119         | 1844         | 1838         | 1276         | 1934         | 1172        | 1966         | <b>17149</b>  | 14.13                       |
| Segment 4    | 3113         | 805          | 1421         | 675          | 1212         | 630         | 1318         | <b>9174</b>   | 7.56                        |
| Segment 5    | 11119        | 2859         | 7269         | 3360         | 3944         | 2352        | 5248         | <b>36151</b>  | 29.79                       |
| Segment 6    | 5586         | 1806         | 2272         | 1521         | 3204         | 1787        | 2107         | <b>18283</b>  | 15.07                       |
| Segment 7    | 799          | 288          | 382          | 218          | 381          | 218         | 235          | <b>2521</b>   | 2.08                        |
| Segment 8    | 564          | 183          | 191          | 84           | 222          | 91          | 145          | <b>1480</b>   | 1.22                        |
| <b>Total</b> | <b>40566</b> | <b>11234</b> | <b>19540</b> | <b>10668</b> | <b>15047</b> | <b>8889</b> | <b>15389</b> | <b>121333</b> |                             |
