# Supplementary material for: Repurposed Transcriptomic Data Reveal Small Viral RNA Produced by Influenza Virus during Infection in Mice
Source: PubMed Central journal article supplement (PMC5082947; doi:10.1371/journal.pone.0165729), 2016-10-27
Supplement: pone.0165729.s005.pdf [file pone.0165729.s005.pdf]

Table S3: Length and segment distribution of influenza virus svRNA sequences

|                    | Seg 1 | Seg 2 | Seg 3 | Seg 4 | Seg 5 | Seg 6 | Seg 7 | Seg 8 | Total       | % all svRNA |
|--------------------|-------|-------|-------|-------|-------|-------|-------|-------|-------------|-------------|
| 15                 | 0     | 0     | 0     | 0     | 0     | 0     | 0     | 0     | 0           | 0.00        |
| 16                 | 0     | 0     | 0     | 0     | 0     | 0     | 0     | 0     | 0           | 0.00        |
| 17                 | 1     | 0     | 0     | 0     | 0     | 0     | 0     | 0     | 1           | 0.01        |
| 18                 | 3     | 0     | 0     | 0     | 0     | 0     | 0     | 1     | 4           | 0.05        |
| 19                 | 100   | 0     | 3     | 0     | 0     | 3     | 0     | 0     | 106         | 1.23        |
| 20                 | 100   | 0     | 34    | 0     | 0     | 48    | 0     | 0     | 182         | 2.11        |
| 21                 | 186   | 0     | 39    | 3     | 0     | 14    | 0     | 1     | 243         | 2.82        |
| 22                 | 191   | 27    | 20    | 1     | 0     | 23    | 2     | 1     | 265         | 3.07        |
| 23                 | 54    | 30    | 31    | 0     | 1     | 16    | 0     | 0     | 132         | 1.53        |
| 24                 | 24    | 46    | 35    | 0     | 1     | 15    | 0     | 0     | 121         | 1.40        |
| 25                 | 93    | 295   | 209   | 4     | 0     | 55    | 0     | 0     | 656         | 7.61        |
| 26                 | 257   | 153   | 914   | 2     | 0     | 501   | 0     | 0     | 1827        | 21.19       |
| 27                 | 50    | 161   | 541   | 0     | 2     | 158   | 0     | 0     | 912         | 10.58       |
| 28                 | 7     | 104   | 749   | 2     | 2     | 94    | 0     | 0     | 958         | 11.11       |
| 29                 | 15    | 142   | 245   | 1     | 1     | 116   | 0     | 0     | 520         | 6.03        |
| 30                 | 3     | 124   | 227   | 0     | 4     | 58    | 0     | 0     | 416         | 4.82        |
| 31                 | 2     | 212   | 51    | 0     | 2     | 113   | 0     | 0     | 380         | 4.41        |
| 32                 | 2     | 526   | 527   | 0     | 4     | 5     | 0     | 0     | 1064        | 12.34       |
| 33                 | 7     | 54    | 64    | 0     | 1     | 5     | 0     | 0     | 131         | 1.52        |
| 34                 | 0     | 173   | 42    | 0     | 15    | 6     | 0     | 0     | 236         | 2.74        |
| 35                 | 1     | 59    | 28    | 0     | 2     | 1     | 0     | 0     | 91          | 1.06        |
| 36                 | 1     | 29    | 44    | 0     | 26    | 0     | 0     | 0     | 100         | 1.16        |
| 37                 | 0     | 8     | 15    | 0     | 45    | 0     | 1     | 0     | 69          | 0.80        |
| 38                 | 1     | 4     | 9     | 0     | 38    | 0     | 0     | 0     | 52          | 0.60        |
| 39                 | 3     | 8     | 1     | 0     | 16    | 0     | 0     | 1     | 29          | 0.34        |
| 40                 | 1     | 6     | 0     | 0     | 3     | 0     | 0     | 0     | 10          | 0.12        |
| 41                 | 0     | 0     | 1     | 0     | 29    | 1     | 0     | 0     | 31          | 0.36        |
| 42                 | 1     | 0     | 1     | 0     | 38    | 0     | 0     | 0     | 40          | 0.46        |
| 43                 | 0     | 0     | 2     | 0     | 3     | 0     | 0     | 0     | 5           | 0.06        |
| 44                 | 0     | 0     | 1     | 0     | 16    | 0     | 0     | 0     | 17          | 0.20        |
| 45                 | 4     | 0     | 0     | 0     | 1     | 3     | 0     | 0     | 8           | 0.09        |
| 46                 | 0     | 0     | 0     | 0     | 0     | 0     | 0     | 0     | 0           | 0.00        |
| 47                 | 0     | 0     | 0     | 0     | 1     | 0     | 0     | 0     | 1           | 0.01        |
| 48                 | 2     | 0     | 0     | 0     | 0     | 1     | 0     | 0     | 3           | 0.03        |
| 49                 | 0     | 0     | 0     | 0     | 0     | 2     | 0     | 0     | 2           | 0.02        |
| 50                 | 0     | 0     | 2     | 0     | 1     | 0     | 0     | 0     | 3           | 0.03        |
| 51                 | 0     | 0     | 0     | 0     | 0     | 0     | 0     | 0     | 0           | 0.00        |
| 52                 | 0     | 0     | 0     | 0     | 0     | 0     | 0     | 0     | 0           | 0.00        |
| 53                 | 2     | 0     | 2     | 0     | 4     | 1     | 0     | 0     | 9           | 0.10        |
| <i>Total</i>       | 1111  | 2161  | 3837  | 13    | 256   | 1239  | 3     | 4     | <b>8624</b> |             |
| <i>% all svRNA</i> | 12.88 | 25.06 | 44.49 | 0.15  | 2.97  | 14.37 | 0.03  | 0.05  |             |             |
