# Supplementary material for: Repurposed Transcriptomic Data Reveal Small Viral RNA Produced by Influenza Virus during Infection in Mice
Source: PubMed Central journal article supplement (PMC5082947; doi:10.1371/journal.pone.0165729), 2016-10-27
Supplement: pone.0165729.s006.pdf [file pone.0165729.s006.pdf]

Table S4: miRNA target predictions for 5'-TTGGATCAGTACCTGCTTTCGCT-3'

| Gene    | Protein description                                                     | mirDB* | DIANA MR-microT** | TargetScan 5 |
|---------|-------------------------------------------------------------------------|--------|-------------------|--------------|
| USP3    | Ubiquitin carboxyl-terminal hydrolase 3                                 | 99     | 0.96              | y            |
| ADAMTS6 | a disintegrin-like and metalloprotease (reprolysin type)                | 93     | 0.99              | y            |
| NUP153  | nucleoporin 153                                                         | 92     | 0.95              | y            |
| B4GALT1 | Beta-1,4-galactosyltransferase 1                                        | 90     | 0.94              | y            |
| H3F3B   | Histone H3.3                                                            | 86     | 0.95              | y            |
| SLITRK5 | SLIT and NTRK-like protein 5 Precursor                                  | 91     | 0.8               | y            |
| RPRD1A  | Regulation of nuclear pre-mRNA domain-containing protein 1A             | 98     | 0.87              | nd           |
| UNC79   | Component of the NALCN sodium channel complex                           | 97     | 0.82              | nd           |
| ERC2    | ERC protein 2                                                           | 95     | 0.86              | nd           |
| SYT15   | Synaptotagmin-15                                                        | 95     | 0.9               | nd           |
| ATM     | Serine-protein kinase ATM                                               | 95     | 0.97              | nd           |
| CSN3    | Kappa-casein Precursor                                                  | 92     | 0.96              | nd           |
| EPHA7   | Ephrin type-A receptor 7 Precursor                                      | 88     | 0.82              | nd           |
| HMGXB4  | HMG box domain containing 4                                             | 88     | 0.97              | nd           |
| ELAVL4  | ELAV-like protein 4                                                     | 84     | 0.89              | nd           |
| CTTN    | Src substrate cortactin                                                 | 97     | 0.74              | y            |
| VGLL3   | Transcription cofactor vestigial-like protein 3                         | 93     | nd                | y            |
| PLEKHA6 | Pleckstrin homology domain-containing family A member 6                 | 87     | nd                | y            |
| TCEA1   | Transcription elongation factor A protein                               | 83     | 0.61              | y            |
| CDC40   | Pre-mRNA-processing factor 17                                           | 83     | 0.7               | y            |
| ARID5B  | AT-rich interactive domain-containing protein 5B                        | 82     | nd                | y            |
| CPEB2   | Cytoplasmic polyadenylation element-binding protein 2                   | 82     | 0.51              | y            |
| PCBP1   | Poly(rC)-binding protein 1                                              | 67     | 0.98              | y            |
| FOXP3   | Forkhead box protein N3                                                 | nd     | 0.95              | y            |
| GPBP1   | Vasculin (GC-rich promoter-binding protein 1)                           | 65     | 0.94              | y            |
| CDH2    | Cadherin-2 Precursor                                                    | 72     | 0.93              | y            |
| GJC1    | Gap junction gamma-1 protein                                            | 50     | 0.89              | y            |
| SP1     | Transcription factor Sp1                                                | nd     | 0.87              | y            |
| SLC6A14 | Sodium- and chloride-dependent neutral and basic amino acid transporter | nd     | 0.84              | y            |
| KLHL14  | kelch-like 14                                                           | nd     | 0.83              | y            |
| NEGR1   | Neuronal growth regulator 1 Precursor                                   | nd     | 0.82              | y            |
| EGLN3   | Hypoxia-inducible factor prolyl hydroxylase 3                           | nd     | 0.82              | y            |
| ANKRD49 | Ankyrin repeat domain-containing protein 49                             | nd     | 0.81              | y            |

\* mirDB target score

\*\* positive predictive value
